# Supplementary material for: Environmental factors driving infestations of a keystone winter fruit by an invasive and a native fruit fly
Source: Springer Nature journal article supplement (doi:10.1007/s11829-024-10073-6), 2024-05-27
Supplement: MOESM1 [file 11829_2024_10073_MOESM1_ESM.pdf]

## Supplementary Material

### Article:

Deconninck G., Boulembert M., Eslin P., Couty A., Bonis A., Borowiec N., Buch I., Colinet H., Delbac L., Dubois F., Foray V., Gallet-Moron E., Lemauviel-Lavenant S., Llopis S., Odoux J.-F., Pincebourde S., Thaon M., Till-Bottraud I. & Chabrierie O. (2024) Environmental factors driving infestations of a keystone winter fruit by an invasive and a native fruit fly. *Arthropod-Plant Interactions*. <https://doi.org/10.1007/s11829-024-10073-6>

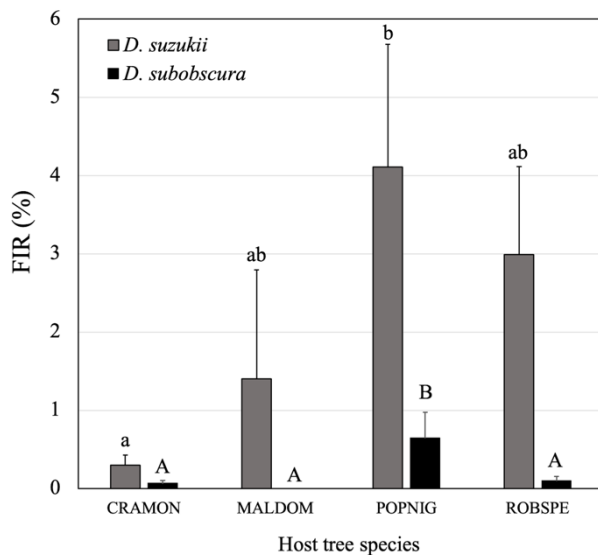

**Figure S1** Mean fruit infestation rate (FIR)  $\pm$  SE (%) by *D. suzukii* and *D. subobscura* in *Viscum album* individuals according to the major host tree species of *Viscum album*. CRAMON: *Crataegus monogyna* ( $n = 66$  samples), MALDOM: *Malus domestica* ( $n = 36$ ), POPNIG: *Populus nigra* ( $n = 60$ ), ROBSPE: *Robinia pseudoacacia* ( $n = 43$ ). Significance of differences between months are represented by different lowercase and capital letters for *D. suzukii* (GLMM:  $F = 3.00$ ,  $p = 0.04$ ) and *D. subobscura* (GLMM:  $F = 2.63$ ,  $p = 0.05$ ) respectively.

**Table S1** Host trees of *Viscum album* individuals sampled in the study and mean FIR  $\pm$  SE (%) by *D. suzukii* (*Dsuz*) and *D. subobscura* (*Dsub*).

| Species                                   | Code   | Number | %     | <i>Dsuz</i> mean<br>FIR $\pm$ SE (%) | <i>Dsub</i> mean<br>FIR $\pm$ SE (%) |
|-------------------------------------------|--------|--------|-------|--------------------------------------|--------------------------------------|
| <i>Acer campestre</i>                     | ACECAM | 13     | 4.9%  | 0.00 $\pm$ 0.00                      | 0.00 $\pm$ 0.00                      |
| <i>Acer opalus</i>                        | ACEOPA | 3      | 1.1%  | 0.00 $\pm$ 0.00                      | 0.00 $\pm$ 0.00                      |
| <i>Acer saccharinum</i>                   | ACESAC | 4      | 1.5%  | 9.64 $\pm$ 4.14                      | 0.00 $\pm$ 0.00                      |
| <i>Acer</i> sp.                           | ACESP  | 7      | 2.7%  | 4.41 $\pm$ 4.10                      | 0.28 $\pm$ 0.28                      |
| <i>Carpinus betulus</i>                   | CARBET | 5      | 1.9%  | 12.28 $\pm$ 10.31                    | 0.20 $\pm$ 0.20                      |
| <i>Corylus avellana</i>                   | CORAVE | 1      | 0.4%  | 0.00 $\pm$ 0.00                      | 0.00 $\pm$ 0.00                      |
| <i>Crataegus monogyna</i>                 | CRAMON | 66     | 25.0% | 0.30 $\pm$ 0.13                      | 0.07 $\pm$ 0.03                      |
| <i>Fraxinus</i> sp.                       | FRASP  | 4      | 1.5%  | 0.97 $\pm$ 0.97                      | 0.33 $\pm$ 0.33                      |
| <i>Malus domestica</i>                    | MALDOM | 36     | 13.6% | 1.40 $\pm$ 1.39                      | 0.00 $\pm$ 0.00                      |
| <i>Populus alba</i>                       | POPALB | 3      | 1.1%  | 0.00 $\pm$ 0.00                      | 0.29 $\pm$ 0.29                      |
| <i>Populus nigra</i>                      | POPNEG | 60     | 22.7% | 4.11 $\pm$ 1.57                      | 0.65 $\pm$ 0.32                      |
| <i>Populus</i> $\times$ <i>canadensis</i> | POPCAN | 1      | 0.4%  | 0.00 $\pm$ 0.00                      | 0.00 $\pm$ 0.00                      |
| <i>Prunus avium</i>                       | PRUAVI | 1      | 0.4%  | 0.00 $\pm$ 0.00                      | 0.00 $\pm$ 0.00                      |
| <i>Prunus</i> sp.                         | PRUNUS | 3      | 1.1%  | 0.00 $\pm$ 0.00                      | 0.00 $\pm$ 0.00                      |
| <i>Pyrus communis</i>                     | PYRCOM | 1      | 0.4%  | 0.00 $\pm$ 0.00                      | 0.00 $\pm$ 0.00                      |
| <i>Quercus ilex</i>                       | QUEILE | 3      | 1.1%  | 14.67 $\pm$ 14.67                    | 0.00 $\pm$ 0.00                      |
| <i>Quercus pubescens</i>                  | QUEPUB | 2      | 0.8%  | 0.00 $\pm$ 0.00                      | 0.00 $\pm$ 0.00                      |
| <i>Quercus rubra</i>                      | QUERUB | 1      | 0.4%  | 0.00 $\pm$ 0.00                      | 0.00 $\pm$ 0.00                      |
| <i>Quercus</i> sp.                        | QUERCU | 1      | 0.4%  | 0.00 $\pm$ 0.00                      | 0.00 $\pm$ 0.00                      |
| <i>Robinia pseudoacacia</i>               | ROBSPE | 43     | 16.3% | 2.99 $\pm$ 1.12                      | 0.10 $\pm$ 0.05                      |
| <i>Tilia platyphyllos</i>                 | TILPLA | 2      | 0.8%  | 0.64 $\pm$ 0.23                      | 0.00 $\pm$ 0.00                      |
| <i>Tilia</i> sp.                          | TILSP  | 4      | 1.5%  | 0.34 $\pm$ 0.34                      | 0.00 $\pm$ 0.00                      |
| <b>TOTAL</b>                              |        | 264    | 100%  | 2.37 $\pm$ 0.53                      | 0.20 $\pm$ 0.08                      |

**Table S2** List of the variables assessed in the study. Abbreviations: s: measure from weather station, 7J and 14J: measures collected from the 7 and 14 days prior to sample collection.

| CATEGORY                                    | CODE     | DESCRIPTION                                                                                                                                                                                                                     | UNIT            |
|---------------------------------------------|----------|---------------------------------------------------------------------------------------------------------------------------------------------------------------------------------------------------------------------------------|-----------------|
| <b>DROSOPHILIDAE SPECIES</b>                |          |                                                                                                                                                                                                                                 |                 |
| <b>INFESTATION INDICES</b>                  | FIR      | Fruit Infestation Rate = $100 \times$ number of emerged <i>Drosophila</i> individuals from fruit collected from a <i>Viscum album</i> individual / total number of fruit collected from the same <i>Viscum album</i> individual | %               |
|                                             | PIR      | Plant Infestation Rate = $100 \times$ number of infested <i>Viscum album</i> individuals in a region or month / total number of <i>Viscum album</i> individuals sampled in the same region or month                             | %               |
| <b>MISTLETOE FRUIT CATEGORIES</b>           |          |                                                                                                                                                                                                                                 |                 |
| <b>NUMBER</b>                               | HEAFRUIT | Number of healthy fruit collected on a <i>Viscum album</i> individual                                                                                                                                                           | Number          |
|                                             | DAMFRUIT | Number of damaged fruit (rotten or with open skin) collected on a <i>Viscum album</i> individual                                                                                                                                | Number          |
|                                             | PLAFRUIT | Sum of healthy and damaged fruit collected on a <i>Viscum album</i> individual                                                                                                                                                  | Number          |
|                                             | GROFRUIT | Number of fruit collected on the ground below a <i>Viscum album</i> individual                                                                                                                                                  | Number          |
|                                             | TOTFRUIT | Sum of <i>Viscum album</i> fruit collected on the plant and on the ground                                                                                                                                                       | Number          |
| <b>PERCENTAGE</b>                           | %HEALPLA | $100 \times$ HEAFRUIT / PLAFRUIT                                                                                                                                                                                                | %               |
|                                             | %DAMAPLA | $100 \times$ DAMFRUIT / PLAFRUIT                                                                                                                                                                                                | %               |
|                                             | %HEALTOT | $100 \times$ HEAFRUIT / TOTFRUIT                                                                                                                                                                                                | %               |
|                                             | %DAMATOT | $100 \times$ DAMFRUIT / TOTFRUIT                                                                                                                                                                                                | %               |
|                                             | %FPLANT  | $100 \times$ PLAFRUIT / TOTFRUIT                                                                                                                                                                                                | %               |
|                                             | %GROUTOT | $100 \times$ GROFRUIT / TOTFRUIT                                                                                                                                                                                                | %               |
| <b>LIFE TRAITS OF MISTLETOE INDIVIDUALS</b> |          |                                                                                                                                                                                                                                 |                 |
| <b>FRUIT TRAITS</b>                         | MFWIDTH  | Mean fruit width (n = 5 fruit)                                                                                                                                                                                                  | cm              |
|                                             | MFVOL    | Mean fruit volume (n = 5 fruit)                                                                                                                                                                                                 | cm <sup>3</sup> |
|                                             | MFSURF   | Mean fruit skin area (n = 5 fruit)                                                                                                                                                                                              | cm <sup>2</sup> |
| <b>LEAVE TRAITS</b>                         | MLENGTH  | Mean leaf length (from the base of the petiole to the top/apex of the blade; n = 5 leaves)                                                                                                                                      | cm              |
|                                             | MLWIDTH  | Mean leaf width (n = 5 leaves)                                                                                                                                                                                                  | cm              |
|                                             | MLSURF   | Mean leaf area (area = length $\times$ width; n = 5)                                                                                                                                                                            | cm <sup>2</sup> |

|                                                                              |              |                                                                                                   |         |
|------------------------------------------------------------------------------|--------------|---------------------------------------------------------------------------------------------------|---------|
|                                                                              |              | leaves)                                                                                           |         |
| <b>INDIVIDUAL MORPHOLGY</b>                                                  | LENGTH       | Maximum diameter of <i>Viscum album</i> individual                                                | m       |
|                                                                              | WIDTH        | Minimum diameter of <i>Viscum album</i> individual                                                | m       |
|                                                                              | INDFRUIT     | Total number of fruit present on a sampled <i>Viscum album</i> individual                         | Number  |
|                                                                              | HEIGHT       | Height of <i>Viscum album</i> individual from the ground                                          | m       |
| <b>MISTLETOE HOST TREE</b>                                                   |              |                                                                                                   |         |
| <b>MISTLETOE HOST TREE</b>                                                   | HOSTSPE      | <i>Viscum album</i> host species                                                                  | Species |
|                                                                              | HHEIGHT      | Height of the host tree                                                                           | m       |
|                                                                              | HLENGTH      | Maximum diameter of the host tree canopy                                                          | m       |
|                                                                              | HWIDTH       | Minimum diameter of the host tree canopy                                                          | m       |
|                                                                              | HTRUNK       | Circumference of the host tree trunk                                                              | cm      |
|                                                                              | HMISTLETOE   | Number of <i>Viscum album</i> individuals on the host tree                                        | Number  |
|                                                                              | HMISTLETOE20 | Number of <i>Viscum album</i> individuals in a 20 m radius around the host tree                   | Number  |
|                                                                              | SUMHMIST20   | Sum of <i>Viscum album</i> individuals on the host tree and in a 20 m radius around the host tree | Number  |
| <b>SITE AND LANDSCAPE CHARACTERISTICS</b>                                    |              |                                                                                                   |         |
| <b>LOCAL ENVIRONMENT</b><br>(in a 5 m radius around the mistletoe host tree) | ALTM         | Site altitude                                                                                     | m       |
|                                                                              | SLOM         | Site slope                                                                                        | Degree  |
|                                                                              | CTREE        | Cover of tree layer (height > 8 m)                                                                | %       |
|                                                                              | CSHRUB       | Cover of shrub layer (1-8 m)                                                                      | %       |
|                                                                              | CHERB        | Cover of herb layer (< 1 m)                                                                       | %       |
|                                                                              | HHERBMEAN    | Height of herbaceous layer                                                                        | cm      |
|                                                                              | HLIGN        | Height of woody species (shrubs, trees and lianas)                                                | m       |
|                                                                              | COMP         | Cover of biowaste composter                                                                       | %       |
|                                                                              | SOIL         | Cover of bare soil                                                                                | %       |
|                                                                              | DWOOD        | Cover of dead wood debris on the ground                                                           | %       |
|                                                                              | TLITTER      | Depth of leaf litter                                                                              | cm      |
|                                                                              | LITTER       | Cover of leaf litter                                                                              | %       |
|                                                                              | RIVER        | Cover of stream                                                                                   | %       |
|                                                                              | POND         | Cover of pond                                                                                     | %       |
|                                                                              | PATH         | Cover of (unpaved) pathway                                                                        | %       |

|  |           |                                                                             |        |
|--|-----------|-----------------------------------------------------------------------------|--------|
|  | ROAD      | Cover of road and paved surface                                             | %      |
|  | BUILD     | Cover of building                                                           | %      |
|  | ORC20     | Cover of orchard area (fruit trees and their associated grassland)          | %      |
|  | FOREST20  | Cover of woodland                                                           | %      |
|  | PASTURE20 | Cover of grazed grassland                                                   | %      |
|  | MOW20     | Cover of mown grassland                                                     | %      |
|  | GRASS20   | Cover of grassland (PASTURE20+MOW20)                                        | %      |
|  | SWAMP20   | Cover of swamp                                                              | %      |
|  | CROP20    | Cover of conventional agriculture crop                                      | %      |
|  | VEGGAR20  | Cover of market garden                                                      | %      |
|  | GARDEN20  | Cover of private garden                                                     | %      |
|  | SHRUB     | Cover of shrub                                                              | %      |
|  | BUILD20   | Cover of building                                                           | %      |
|  | HEDGE20   | Cover of hedgerow                                                           | %      |
|  | RIVER20   | Cover of river                                                              | %      |
|  | POND20    | Cover of pond                                                               | %      |
|  | WATER20   | Cover of river and other water surface                                      |        |
|  | POPLARP20 | Cover of poplar plantation                                                  | %      |
|  | GREESP20  | Cover of urban green space (small urban planted herbaceous or shrub strips) | %      |
|  | PARK20    | Cover of park                                                               | %      |
|  | GGSP20    | Total urban vegetated area (sum of garden, green space and park cover)      | %      |
|  | RP_FC     | Fleshy-fruited plant species richness                                       | Number |
|  | CROP%     | Cover of conventional agriculture crop                                      | %      |
|  | WATE%     | Cover of river and other water surface                                      | %      |
|  | FORE%     | Cover of woodland                                                           | %      |
|  | HETH%     | Cover of heathland                                                          | %      |
|  | MOW%      | Cover of grassland                                                          | %      |
|  | ROAD%     | Cover of road and paved surface                                             | %      |
|  | URB%      | Cover of urban area                                                         | %      |
|  | ORC%      | Cover of orchard area (fruit trees and their associated grassland)          | %      |
|  | INDU%     | Cover of industrial zone                                                    | %      |

**LOCAL HABITATS**  
(in a 20 m radius around the mistletoe host tree)

**LANDSCAPE COMPOSITION**  
(from OSO 2022 data basis; cover percentages calculated within the following radii around the mistletoe host tree: 50 m, 100 m, 250 m, 500 m, 750 m, 1000 m, 1250 m, 1500 m, 1750 m, 2000 m, 2500 m and 3000 m)

| METEOROLOGY                                                                                                                                                                                                                                                                                    |             |                                                                                                                                         |        |
|------------------------------------------------------------------------------------------------------------------------------------------------------------------------------------------------------------------------------------------------------------------------------------------------|-------------|-----------------------------------------------------------------------------------------------------------------------------------------|--------|
| <p style="text-align: center;"><b>TEMPERATURE AND<br/>PRECIPITATION VARIABLES</b><br/>(from weather stations data; meanings of<br/>suffixes added to variable names: 7J =<br/>data from the 7 days preceding fruit<br/>sampling, 14J = data from the 14 days<br/>preceding fruit sampling)</p> | GDDMC       | Sum of daily positive temperature (Growing Degree Days) calculated from the mean temperatures of the 7 or 14 days before fruit sampling | °C     |
|                                                                                                                                                                                                                                                                                                | NFD         | Number of days with negative temperatures ( $\leq 0$ °C) during the 7 or 14 days before fruit sampling                                  | Number |
|                                                                                                                                                                                                                                                                                                | RAIN        | Sum of daily precipitation in the 7 or 14 days before the fruit sampling                                                                | cm     |
|                                                                                                                                                                                                                                                                                                | SNOW        | Sum of daily snowfall in the 7 or 14 days before the fruit sampling                                                                     | cm     |
|                                                                                                                                                                                                                                                                                                | MMIN        | Mean minimum temperature during the 7 and 14 days before fruit sampling                                                                 | °C     |
|                                                                                                                                                                                                                                                                                                | MMAX        | Mean maximum temperature during the 7 days before fruit sampling                                                                        | °C     |
|                                                                                                                                                                                                                                                                                                | MMEANCALC   | Calculated mean of daily mean temperatures of the 7 or 14 days before the fruit sampling                                                | °C     |
|                                                                                                                                                                                                                                                                                                | MINMIN      | Lowest minimum temperature during the 7 or 14 days before fruit sampling                                                                | °C     |
|                                                                                                                                                                                                                                                                                                | MAXMAX      | Highest maximum temperature during the 7 or 14 days before fruit sampling                                                               | °C     |
|                                                                                                                                                                                                                                                                                                | SUMT_010122 | Sum of daily positive temperature (Growing Degree Days) between 01/01/2022 and the sampling date                                        | °C     |
|                                                                                                                                                                                                                                                                                                | RAIN_010122 | Sum of rain precipitation between 01/01/2022 and the sampling date                                                                      | cm     |

**Table S3** Weather station information. Geographic area: city of the research laboratory, station city: postcode and the municipality name of the weather station location, Station coordinates: geographic location of the city where the weather station is located, Label city: postcode and municipality name according to Historique-Météo.net, Label city coordinates: geographic location of the label city, Mean distance: mean distance between the weather station and sampled locations (in kilometers). Geographic coordinate system: WGS 84.

| Geographic area | Station city     | Station city coordinates | Label city     | Label city coordinates   | Mean distance (m) |
|-----------------|------------------|--------------------------|----------------|--------------------------|-------------------|
| Amiens          | 80260_Flesselles | 50.0 N, 2.25 E           | 80600_Doullens | 50.15724 N,<br>2.34019 E | 16,288            |

|                  |                                  |                    |                                 |                             |        |
|------------------|----------------------------------|--------------------|---------------------------------|-----------------------------|--------|
|                  | 80160_Essertaux                  | 49.75 N, 2.25 E    | 80000_Amiens                    | 49.894067 N,<br>2.295753 E  | 17,516 |
|                  | 80890_Condé-Folie                | 50.017 N, 2.017 E  | 80420_Flixecourt                | 50.01465 N,<br>2.08095 E    | 22,404 |
|                  | 80300_Albert                     | 50.0 N, 2.65 E     | 80300_Albert                    | 50.00091 N,<br>2.65096 E    | 28,868 |
|                  | 80140_Doudelainville             | 50.0 N, 1.767 E    | 80100_Abbeville                 | 50.105467 N,<br>1.836833 E  | 30,264 |
|                  | 60130_Angivillers                | 49.5 N, 2.5 E      | 80500_Montdidier                | 49.65 N,<br>2.56667 E       | 29,046 |
| Bordeaux         | 33400_Talence                    | 44.817 N, -0.6 O   | 33400_Talence                   | 44.802614 N,<br>-0.588054 O | 3,520  |
|                  | 33360_Quinsac                    | 44.75 N, -0.5 O    | 33000_Bordeaux                  | 44.837789 N,<br>-0.57918 O  | 8,853  |
|                  | 33440_Ambarès-et-Lagrave         | 44.983 N, -0.517 O | 33390_Blaye                     | 45.13333 N,<br>-0.66667 O   | 22,444 |
| Caen             | 14000_Caen                       | 49.183 N, -0.35 O  | 14000_Caen                      | 49.182863 N,<br>-0.370679 O | 11,027 |
|                  | 14170_Saint-Pierre-en-Auge       | 49.0 N, 0.0 E      | 14170_Saint-Pierre-en-Auge      | 49.02022 N,<br>-0.0316086 O | 4,852  |
|                  | 14860_Amfreville                 | 49.25 N, -0.248 O  | 14150_Ouistreham                | 49.276656 N,<br>-0.258658 O | 15,936 |
|                  | 14430_Danestal                   | 49.25 N, 0.017 E   | 14950_Beaumont-en-Auge          | 49.278363 N,<br>0.111144 E  | 27,512 |
|                  | 14400_Bayeux                     | 49.277 N, -0.704 O | 14400_Bayeux                    | 49.276437 N,<br>-0.70314 O  | 22,532 |
|                  | 27270_Saint-Aubin-du-Thenney     | 49.017 N, 0.5E     | 27300_Bernay                    | 49.08888 N,<br>0.59858 E    | 30,614 |
| Clermont-Ferrand | 03000_Moulins                    | 46.567 N, 3.333 E  | 03000_Moulins                   | 46.568059 N,<br>3.334417 E  | 12,255 |
|                  | 63410_Charbonnières-les-Vieilles | 46.0 N, 3.0 E      | 03800_Gannat                    | 46.10015 N,<br>3.19886 E    | 31,664 |
|                  | 03500_Louchy-Montfand            | 46.317 N, 3.25 E   | 03500_Saint-Pourçain-sur-Sioule | 46.30927 N,<br>3.28787 E    | 26,725 |
|                  | 03320_Le Veudre                  | 46.75 N, 3.0 E     | 58000_Nevers                    | 46.990896 N,<br>3.162845 E  | 25,782 |
|                  | 63122_Saint-Gènes-Champanelle    | 45.75 N, 3.017 E   | 63000_Clermont-Ferrand          | 45.777222 N,<br>3.087025 E  | 18,178 |
|                  | 63120_Courpière                  | 45.75 N, 3.55 E    | 63120_Courpière                 | 45.75689 N,<br>3.54216 E    | 18,261 |
|                  | 63740_Gelles                     | 45.767 N, 2.75 E   | 63230_Saint-Ours                | 45.817793 N,<br>2.947995 E  | 18,059 |
|                  | 63320_Courgoul                   | 45.517 N, 3.033 E  | 63450_Saint-Saturnin            | 45.660653 N,<br>3.090363 E  | 22,473 |
|                  | 63500_Le Broc                    | 45.5 N, 3.25 E     | 63500_Issoire                   | 45.54151 N,<br>3.248128 E   | 25,697 |
| Nice             | 04120_Castellane                 | 43.85 N, 6.517 E   | 04120_Castellane                | 43.85 N,<br>6.51667 E       | 5,755  |

|        |                            |                              |                             |                              |        |
|--------|----------------------------|------------------------------|-----------------------------|------------------------------|--------|
|        | 04120_Gorges-du-Verdon     | 43.7613593 N,<br>6.3788372 E | 04120_La-Palud-sur-Verdon   | 43.783000 N,<br>6.333000 E   | 20,377 |
|        | 04000_Digne-les-Bains      | 44.1 N, 6.233 E              | 04000_Digne-les-Bains       | 44.09252 N,<br>6.23199 E     | 35,130 |
|        | 06130_Grasse               | 43.667 N, 6.917 E            | 06130_Grasse                | 43.66667 N,<br>6.91667 E     | 34,072 |
|        | 06140_Vence                | 43.717 N, 7.117 E            | 06140_Vence                 | 43.72254 N,<br>7.11183 E     | 16,624 |
|        | 06250_Mougins              | 43.6 N, 7.0 E                | 06250_Mougins               | 43.6023319 N,<br>7.006491 E  | 18,610 |
|        | 06700_Saint-Laurent-du-Var | 43.667 N, 7.183 E            | 06700_Saint-Laurent-du-Var  | 43.67097 N,<br>7.17606 E     | 13,915 |
| Rennes | 35360_Landujan             | 48.25 N, -2.0 O              | 22100_Lanvallay             | 48.450000 N,<br>-2.033330 O  | 20,409 |
|        | 35520_Montreuil-le-Gast    | 48.25 N, -1.717 O            | 35630_Hédé-Bazouges         | 48.3 N,<br>-1.8 O            | 11,064 |
|        | 35340_Ercé-prés-Liffré     | 48.25 N, -1.5 O              | 35270_Combourg              | 48.41267 N,<br>-1.74424 O    | 20,780 |
|        | 35150_Amanlis              | 48.0N, -1.483 O              | 35000_Rennes                | 48.117266 N,<br>-1.6777926 O | 18,869 |
| Tours  | 37190_Azay-le-Rideau       | 47.267 N, 0.467 E            | 37190_Azay-le-Rideau        | 47.26177 N,<br>0.46574 E     | 20,161 |
|        | 37400_Amboise              | 47.417 N, 0.983 E            | 37400_Amboise               | 47.413326 N,<br>0.984407 E   | 13,491 |
|        | 37190_Cheillé              | 47.25 N, 0.483 E             | 37000_Tours                 | 47.394144 N,<br>0.68484 E    | 24,074 |
|        | 37310_Sublaines            | 47.25 N, 1.0 E               | 37150_Château de Chenonceau | 47.3248696 N,<br>1.0703005 E | 17,622 |
|        | 37600_Loches               | 47.133 N, 1.0 E              | 37600_Loches                | 47.128158 N,<br>0.997664 E   | 27,232 |
|        | 41120_Candé-sur-Beuvron    | 47.5 N, 1.25 E               | 41000_Blois                 | 47.5860921 N,<br>1.3359475 E | 25,144 |
